# Supplementary material for: cGMP production of patient-specific iPSCs and photoreceptor precursor cells to treat retinal degenerative blindness
Source: PubMed Central journal article supplement (PMC4965859; doi:10.1038/srep30742), 2016-07-29
Supplement: srep30742-s1.pdf [file srep30742-s1.pdf]

## **Supplementary Information**

**Title:** cGMP production of patient-specific iPSCs and photoreceptor precursor cells to treat retinal degenerative blindness

**Running Title:** cGMP production of patient-specific photoreceptors

**Authors:** Luke A. Wiley<sup>1</sup>, Erin R. Burnight<sup>1</sup>, Adam P. DeLuca<sup>1</sup>, Kristin R. Anfinson<sup>1</sup>, Cathryn M. Cranston<sup>1</sup>, Emily E. Kaalberg<sup>1</sup>, Jessica A. Penticoff<sup>1</sup>, Louisa M. Affatigato<sup>1</sup>, Robert F. Mullins<sup>1</sup>, Edwin M. Stone<sup>1</sup> and Budd A. Tucker<sup>1</sup>

**Supplemental Table 1. List of clinical-grade patient-specific iPSC-derived photoreceptor precursor cell lines used for *in vivo* tumorigenicity analysis.** Age = patient age at biopsy, 12 week endpoint = number of mice analyzed per patient-specific photoreceptor precursor cell line at 12 weeks post-injection, 12 month endpoint = number of mice analyzed per patient-specific photoreceptor precursor cell line at 12 months post-injection. IM = intramuscular, SR = subretinal.

| Age | Clinical Diagnosis   | Gender | 12 week endpoint | 12 month endpoint | Injection Site |
|-----|----------------------|--------|------------------|-------------------|----------------|
| 10  | Retinitis Pigmentosa | Male   | N=8 (4M, & 4F)   | N=8 (4M, & 4F)    | IM             |
| 38  | Retinitis Pigmentosa | Female | N=8 (4M, & 4F)   | N=0               | IM             |
| 47  | Best Disease         | Female | N=8 (4M, & 4F)   | N=0               | IM             |
| 58  | Retinitis Pigmentosa | Male   | N=8 (4M, & 4F)   | N=0               | IM             |
| 68  | Retinitis Pigmentosa | Female | N=8 (4M, & 4F)   | N=0               | IM             |
| 72  | Retinitis Pigmentosa | Male   | N=8 (4M, & 4F)   | N=0               | IM             |
| 10  | Retinitis Pigmentosa | Male   | N=5 (2M, & 3F)   | N=0               | SR             |
| 72  | Retinitis Pigmentosa | Male   | N=5 (3M, & 2F)   | N=0               | SR             |

# Supplemental Figure 1

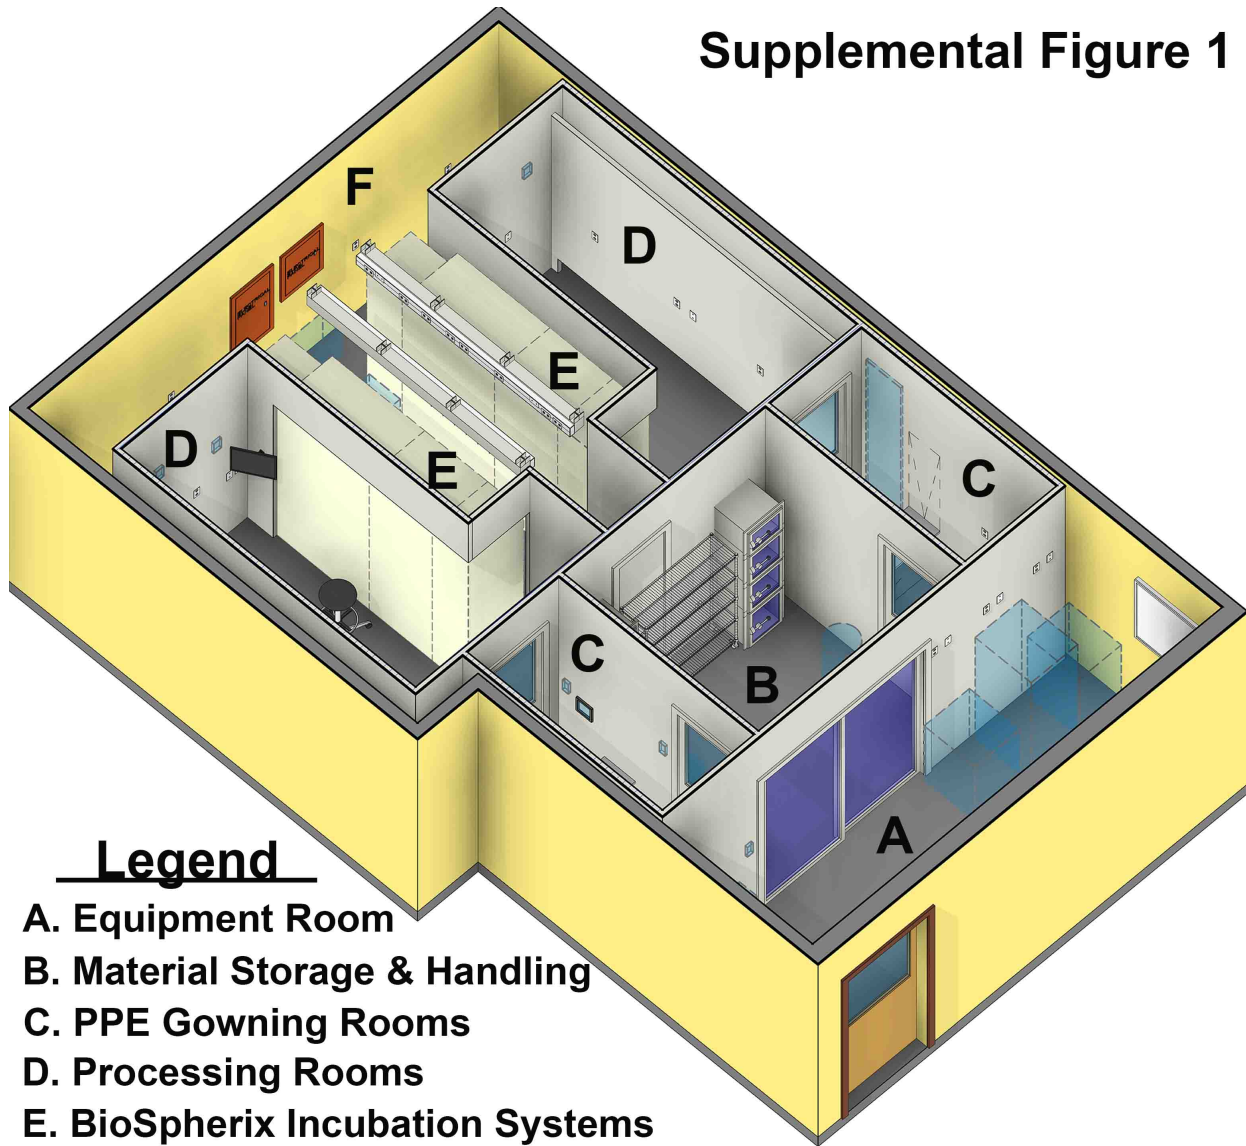

## Legend

- A. Equipment Room
- B. Material Storage & Handling
- C. PPE Gowning Rooms
- D. Processing Rooms
- E. BioSpherix Incubation Systems
- F. Service Chase

### **Supplemental Figure 1: The Steven W. Dezii Translational Vision Research**

**Facility.** Architectural rendering of the Steven W. Dezii Translational Vision Research Facility. This state-of-the-art FDA-registered cGMP facility contains a HEPA-filtered equipment room (A), an independent ISO Class 7 material storage and handling room (B), two ISO Class 7 PPE gowning rooms (C), and two ISO Class 6 processing rooms (D) equipped with two ISO Class 5 BioSpherix Xvivo Closed Incubation Systems (E). An independent service chase (F) room serves as access to expunged media and allows for monitoring and maintenance of the BioSpherix Systems.

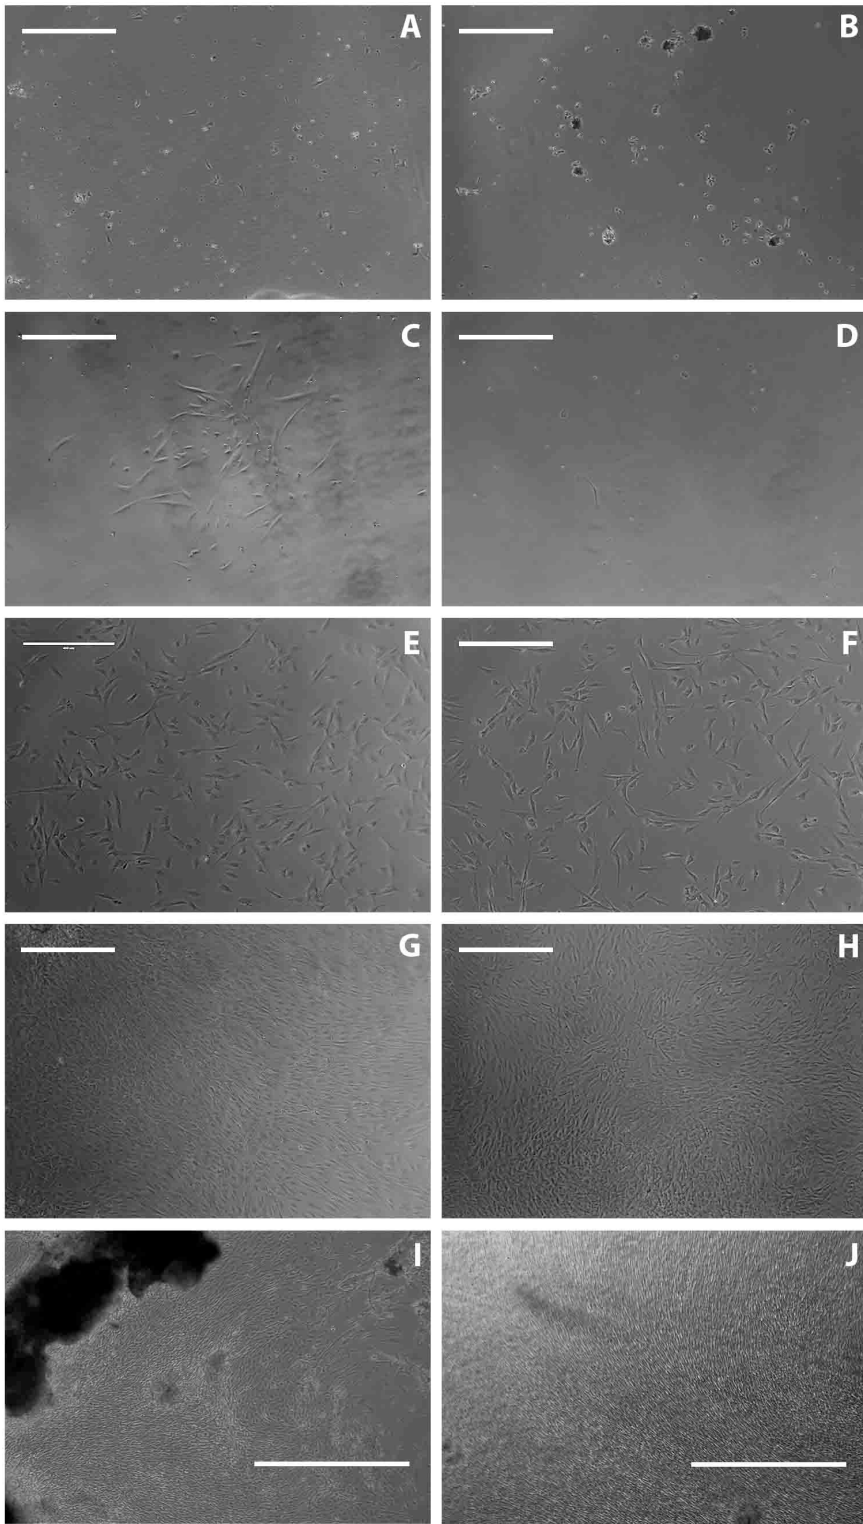

**Supplemental Figure 2**

**Supplemental Figure 2: Testing of commercial xeno-free fibroblast culture medias and in-house-generated cGMP IxMedia.** At 10 days post-plating fibroblasts cultured in either FGM-CD™ (A-B) or MesenCult™ (C-D) were sparse, compared to healthy, evenly distributed fibroblasts observed after just a single day of culture in IxMedia (E-F). Ten days after culture in IxMedia, fibroblasts were confluent and ready to be passaged (G-H). Fibroblasts from an 81-year-old patient with no light perception vision that failed to grow when cultured in either FGM-CD™ or MesenCult™ displayed extensive outgrowth after 7 days in IxMedia (I) and were ready for passage by 14 days post-plating (J). Scale bars = 200 μm.

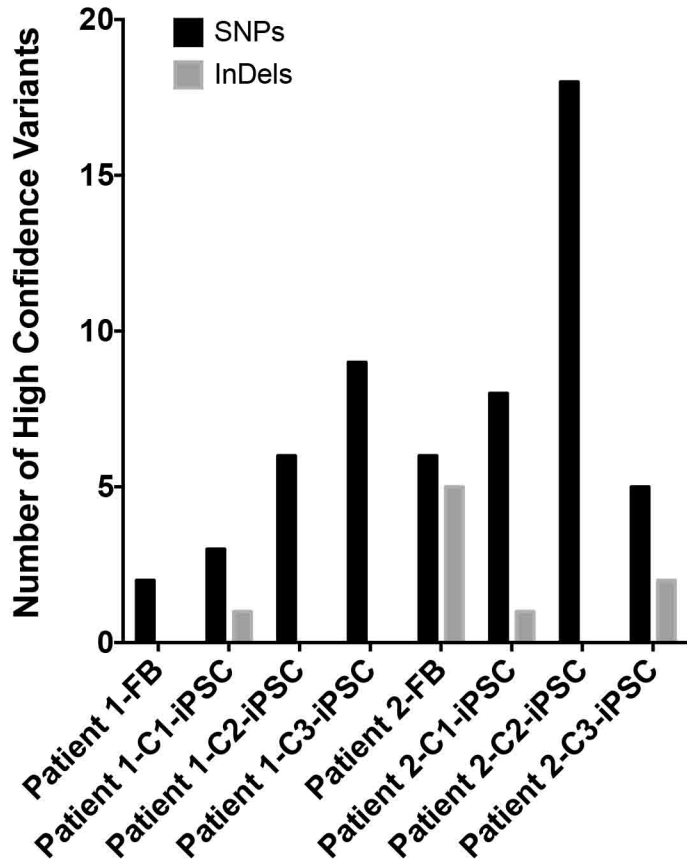

**Supplemental Figure 3**

**Supplemental Figure 3: Whole genome sequencing of patient-derived fibroblasts and iPSCs.** Number of high confidence single nucleotide polymorphisms (SNPs) and insertions or deletions (InDels) observed in fibroblasts and three independent iPSC clones derived from Patient 1 and Patient 2 (see Figure 1).



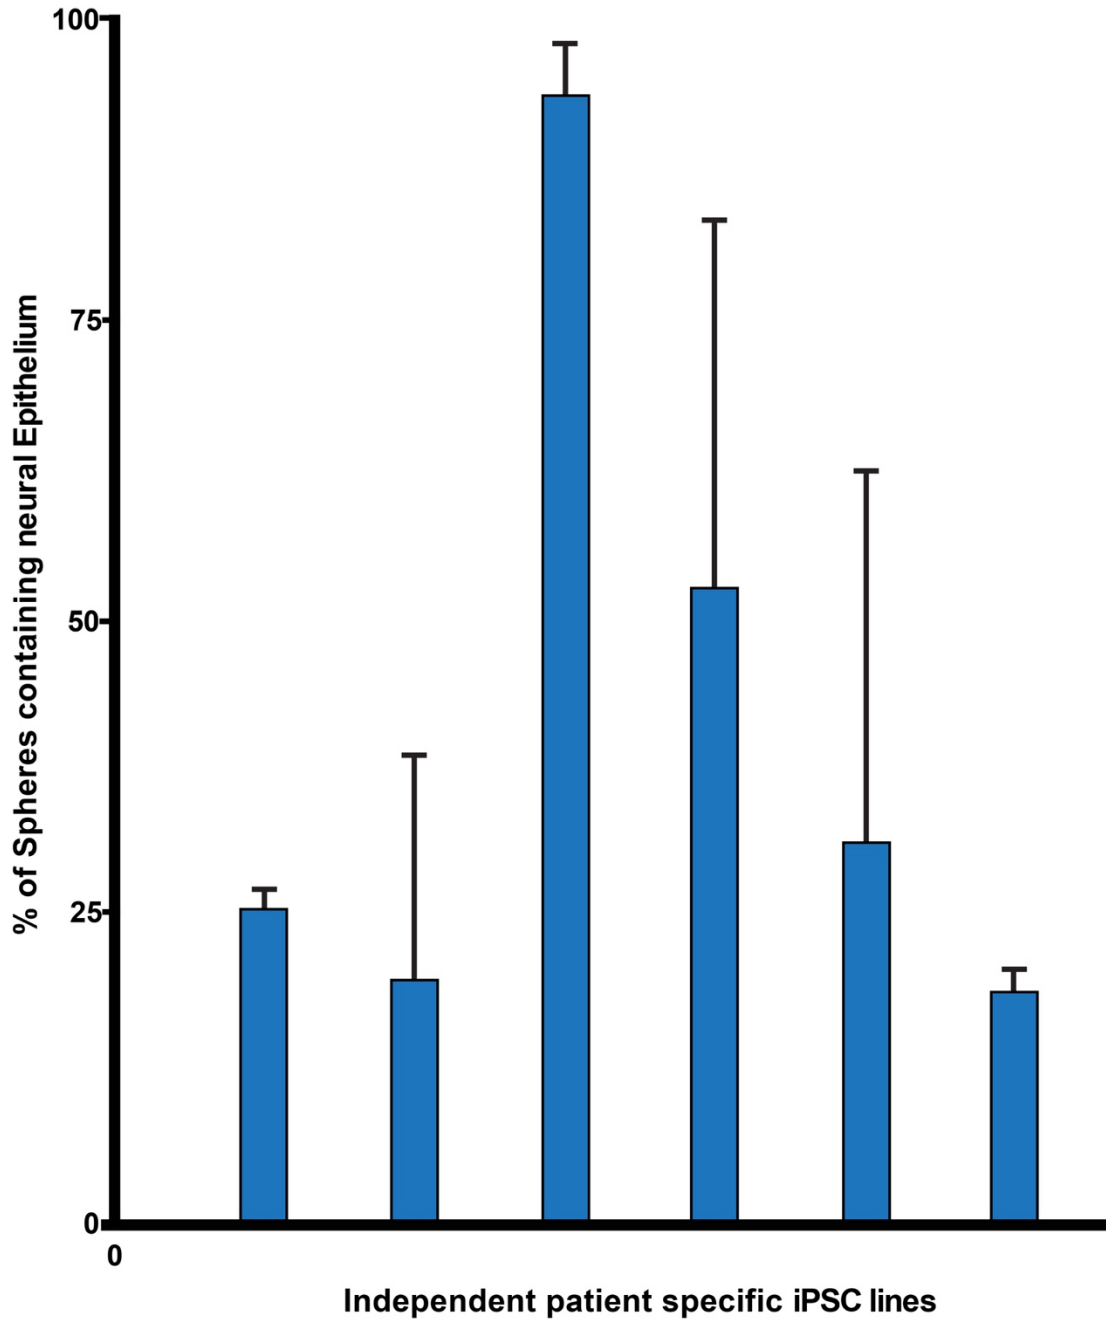

**Supplemental Figure 4**

**Supplemental Figure 4: Efficiency of retinal organoid formation.** Each bar represents an independent patient-specific cell line. Error bars – SEM, represent independent experiment repeats.

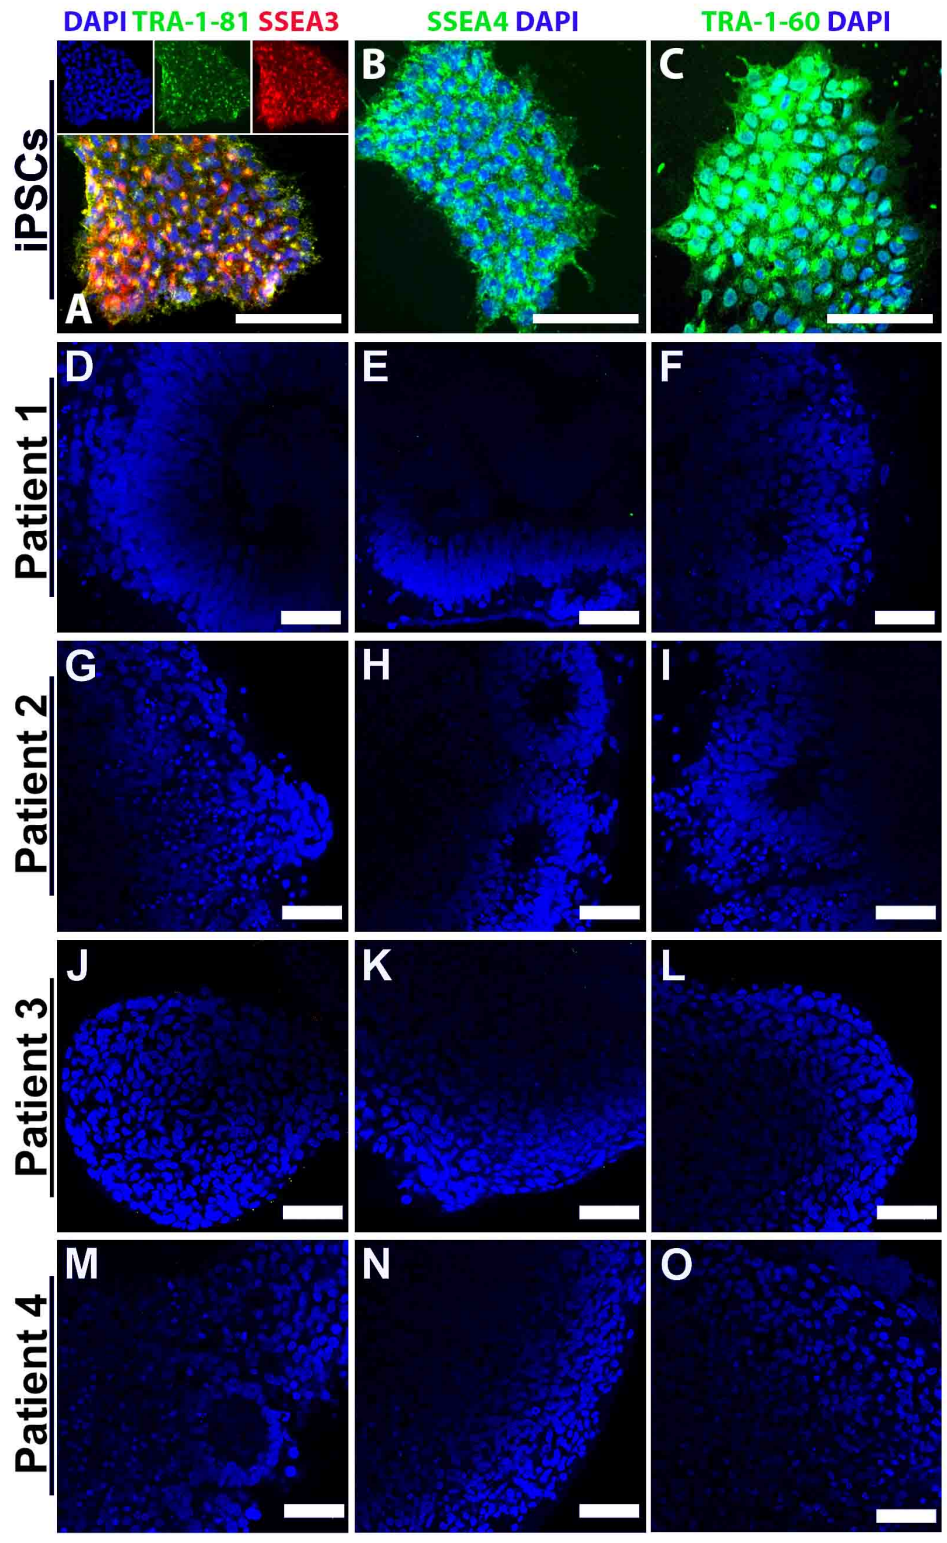

Supplemental Figure 5

**Supplemental Figure 5: Differentiating 3D eyecups exhibit complete loss of pluripotency markers.** Immunocytochemical assessment of the pluripotency markers, TRA-1-81, TRA-1-60, SSEA-3 and SSEA-4 in undifferentiated iPSCs and 3D eyecups after 7 weeks of differentiation. **A-C:** Undifferentiated iPSCs exhibit positive labeling for the pluripotency markers TRA-1-81 (A; green), SSEA-3 (A; red), SSEA-4 (B; green) and TRA-1-60 (C; green). **D-O:** All four independent lines of patient-specific differentiated 3D eyecups (Patients 1-4) completely lack expression of TRA-1-81, TRA-1-60, SSEA-3 and SSEA-4. Scale bars = 100  $\mu$ m in A-C and 50  $\mu$ m in D-O.
